# Supplementary material
Source: publisher figshare collection journal article supplement (https://aacr.figshare.com/ndownloader/files/41457856)

## Early-onset esophagogastric adenocarcinoma

**Supplementary Figure 2.** Early- (age 20-54 years) and later-onset (55-99 years) esophagogastric adenocarcinoma incidence rate (IR) per 100,000 person-years over years 1993-2019, comparing empirical estimates (dots), modeled linear predictions with no breakpoint (blue solid line), together with linear predictions including one breakpoint year (red solid line) identified using piecewise linear regression.

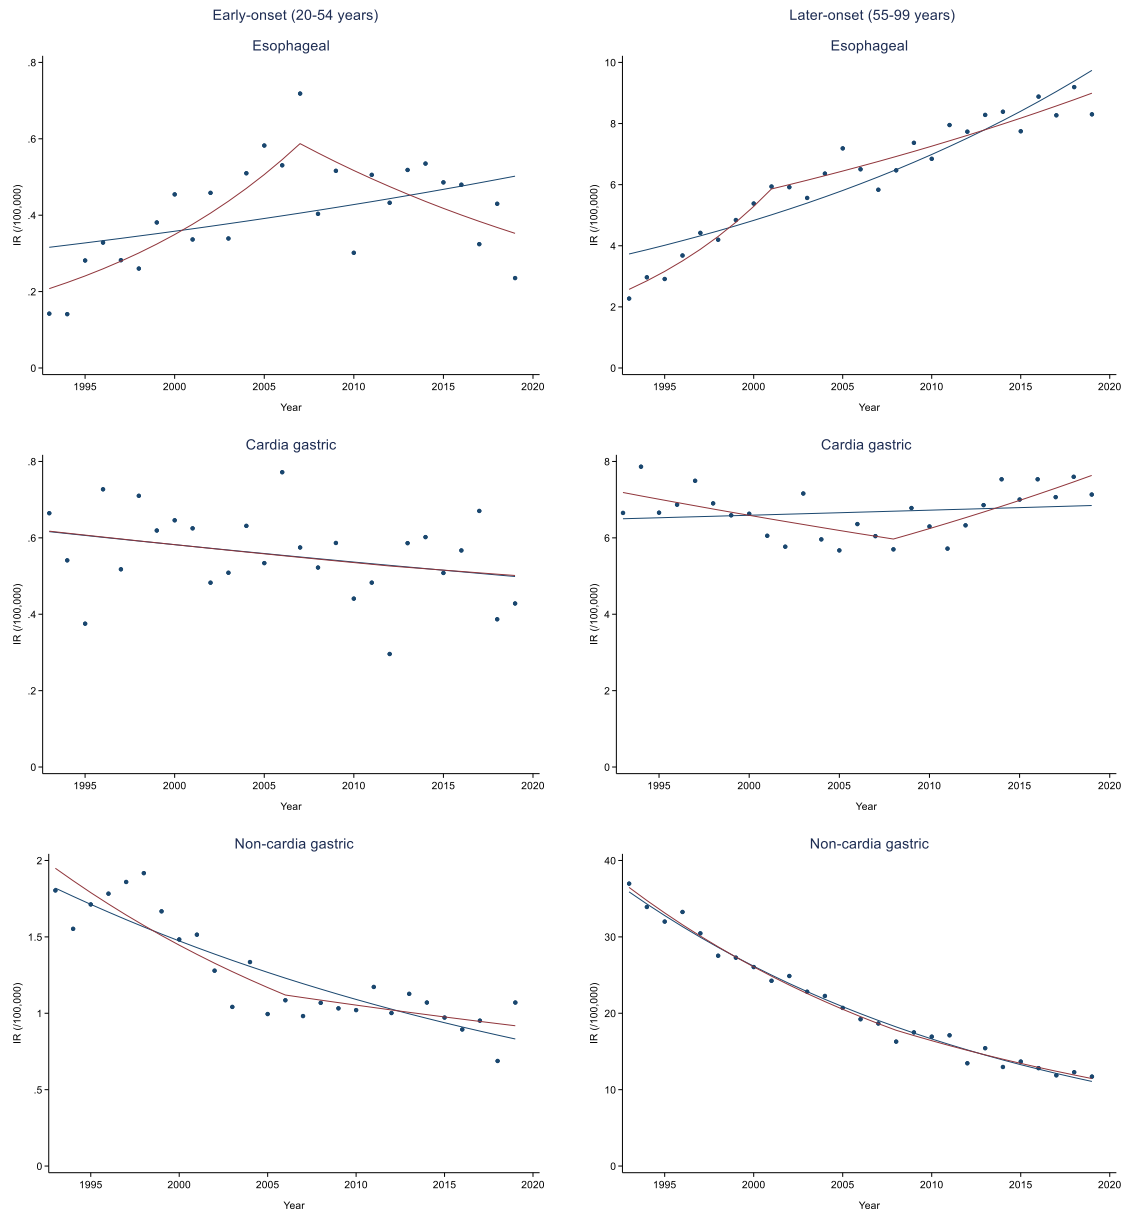

Supplement: Supplementary file 1 [file 41457856]
